# Supplementary material
Source: publisher figshare collection journal article supplement (https://frontiersin.figshare.com/ndownloader/files/13439042)
Supplement: Supplementary file [file 13439042]

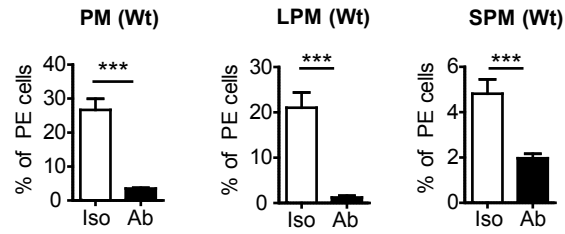

**Supplementary Figure S2.** Percentages of total peritoneal macrophages (PM), large peritoneal macrophages (LPM) and small peritoneal macrophages (SPM) in peritoneal exudate of wild type (Wt) mice after *in vivo* neutralization of M-CSF with anti-M-CSF specific antibody (Ab) or isotype (Iso) control (n=7-8 mice, data are pooled from two independent experiments). Statistical analysis was performed using unpaired Student's t-test, \*\*\* p<0.001.
